# Supplementary material
Source: publisher figshare collection journal article supplement (https://tandf.figshare.com/articles/dataset/_/5684128)
Supplement: Supplementary file 3 [file 1]

**Supplementary information: Name and European license holder for the 32 new medicines approved by the EMA during 2014**

| <b>Trade name</b> | <b>Approved (generic) name</b>     | <b>European license holder</b>                                                            |
|-------------------|------------------------------------|-------------------------------------------------------------------------------------------|
| Adempas           | riociguat                          | Bayer AG                                                                                  |
| Cometriq          | cabozantinib                       | Ipsen Pharma                                                                              |
| Cyramza           | ramucirumab                        | Eli Lilly Nederland B.V.                                                                  |
| Daklinza          | daclatasvir                        | Bristol-Myers Squibb Pharma EEIG                                                          |
| Deltysba          | delamanid                          | Otsuka Novel Products GmbH                                                                |
| Entyvio           | vedolizumab                        | Takeda Pharma A/S                                                                         |
| Eperzan           | albiglutide                        | GlaxoSmithKline Trading Services Ltd                                                      |
| Gazyvaro          | obinutuzumab                       | Roche Registration Ltd                                                                    |
| Harvoni           | ledispavir 90mg / sofosbuvir 400mg | Gilead Sciences International Ltd                                                         |
| Imbruvica         | ibrutinib                          | Janssen-Cilag International NV                                                            |
| Incruse           | umeclidinium bromide               | Glaxo Group Ltd                                                                           |
| Jardiance         | empagliflozin                      | Boehringer Ingelheim International GmbH                                                   |
| Latuda            | lurasidone                         | Sunovion Pharmaceuticals Europe Ltd                                                       |
| Lynparza          | olaparib                           | AstraZeneca AB                                                                            |
| Mekinist          | trametinib                         | Novartis Europharm Limited                                                                |
| Moventig          | naloxegol oxalate                  | AstraZeneca AB<br>[note - ownership passed to Kyowa Kirin Limited after data collection]. |
| Nuwiq             | simoctocog alfa (rFVIII)           | Octapharma AB                                                                             |

|            |                                                                     |                                                  |
|------------|---------------------------------------------------------------------|--------------------------------------------------|
| Olysio     | simeprevir                                                          | Janssen-Cilag International N.V.                 |
| Plegridy   | peginterferon beta-1a                                               | Biogen Idec Ltd                                  |
| Rixubis    | nonacog gamma                                                       | Baxalta Innovations GmbH                         |
| Scenesse   | afamelanotide                                                       | Clinuvel UK Ltd                                  |
| Sirturo    | bedaquiline fumarate                                                | Janssen-Cilag International N.V.                 |
| Sovaldi    | sofosbuvir                                                          | Gilead Sciences International Ltd                |
| Sylvant    | siltuximab                                                          | Janssen-Cilag International N.V.                 |
| Tecfidera  | dimethyl fumarate                                                   | Biogen Idec Ltd                                  |
| Tivicay    | dolutegravir                                                        | ViiV Healthcare                                  |
| Translarna | ataluren                                                            | PTC Therapeutics International Limited           |
| Trulicity  | dulaglutide                                                         | Eli Lilly Nederland B.V.                         |
| Vargatef   | nintedanib                                                          | Boehringer Ingelheim International GmbH          |
| Velphoro   | mixture of polynuclear iron(III)-oxyhydroxide, sucrose and starches | Vifor Fresenius Medical Care Renal Pharma France |
| Vimizim    | elosulfase alfa                                                     | BioMarin Europe Ltd                              |
| Zydelig    | idelalisib                                                          | Gilead Sciences International Ltd                |
