# Supplementary material
Source: publisher figshare collection journal article supplement (https://tandf.figshare.com/articles/dataset/_/5684128)
Supplement: Supplementary file 8 [file 1]

## Disclosure Results

**Trulicity**

**European Marketing Authorisation Holder: Eli Lilly Nederland B.V.**

| phase        | total complete by 31 July 2016 | un-evaluable | evaluable | disclosed in 12 month timeframe | disclosed percentage at 12 months | complete by 31 July 2016 | disclosed at 31 July 2016 | disclosure percentage at 31st July 2016 |
|--------------|--------------------------------|--------------|-----------|---------------------------------|-----------------------------------|--------------------------|---------------------------|-----------------------------------------|
| phase I & II | 15                             | 0            | 15        | 13                              | 87%                               | 15                       | 13                        | 87%                                     |
| phase III    | 13                             | 1            | 12        | 12                              | 100%                              | 12                       | 12                        | 100%                                    |
| phase IV     | 0                              | 0            | 0         | 0                               |                                   | 0                        | 0                         |                                         |
| other        | 0                              | 0            | 0         | 0                               |                                   | 0                        | 0                         |                                         |
| <b>total</b> | <b>28</b>                      | <b>1</b>     | <b>27</b> | <b>25</b>                       | <b>93%</b>                        | <b>27</b>                | <b>25</b>                 | <b>93%</b>                              |

**Footnote (company communication):** Two phase I trials in patients carried out in Japan remained undisclosed at 31 July 2016. Both were out of scope of reporting requirements in Japan.

### **Key to columns in table above:**

total complete by 31 July 2016 = total number of company-sponsored trials identified which were completed by 31 July 2016

unevaluable = trials with completion date within the last 12 months, or key dates missing - excluded from the analysis

evaluable = trials with all criteria present including dates; hence the base number of trials evaluated for the assessment

disclosed in 12 month timeframe = evaluable trials which were disclosed within the target 12 months\*

disclosed percentage at 12 months = proportion of evaluable trials which were disclosed within 12 months\*

complete before 31 July 2016 = number of evaluable trials completed before 31 July 2016

disclosed at 31 July 2016 = number of evaluable trials with results disclosed by 31 July 2016

disclosure percentage at 31 July 2016 = proportion of evaluable trials which were disclosed by 31 July 2016

[\* 12 months measured from the later of: the first date of regulatory approval (in Europe or the US) or the trial completion date]
