# Supplementary material
Source: publisher figshare collection journal article supplement (https://tandf.figshare.com/articles/dataset/_/5684128)
Supplement: Supplementary file 11 [file 1]

Archive with 33 entries (33 files):
- icmo_a_1415057_sm1611.pdf
- icmo_a_1415057_sm1610.pdf
- icmo_a_1415057_sm1609.pdf
- icmo_a_1415057_sm1608.pdf
- icmo_a_1415057_sm1607.pdf
- icmo_a_1415057_sm1606.pdf
- icmo_a_1415057_sm1605.pdf
- icmo_a_1415057_sm1604.pdf
- icmo_a_1415057_sm1603.pdf
- icmo_a_1415057_sm1602.pdf
- icmo_a_1415057_sm1601.pdf
- icmo_a_1415057_sm1600.pdf
- icmo_a_1415057_sm1599.pdf
- icmo_a_1415057_sm1598.pdf
- icmo_a_1415057_sm1597.pdf
- icmo_a_1415057_sm1596.pdf
- icmo_a_1415057_sm1595.pdf
- icmo_a_1415057_sm1594.pdf
- icmo_a_1415057_sm1593.pdf
- icmo_a_1415057_sm1592.pdf
- icmo_a_1415057_sm1591.pdf
- icmo_a_1415057_sm1590.pdf
- icmo_a_1415057_sm1589.pdf
- icmo_a_1415057_sm1588.pdf
- icmo_a_1415057_sm1587.pdf
- icmo_a_1415057_sm1586.pdf
- icmo_a_1415057_sm1585.pdf
- icmo_a_1415057_sm1584.pdf
- icmo_a_1415057_sm1583.pdf
- icmo_a_1415057_sm1582.pdf
- icmo_a_1415057_sm1581.pdf
- icmo_a_1415057_sm1580.pdf
- icmo_a_1415057_sm1579.pdf
