# Supplementary material
Source: publisher figshare collection journal article supplement (https://tandf.figshare.com/articles/dataset/_/5684128)
Supplement: Supplementary file 11 [file 1 › icmo_a_1415057_sm1592.pdf]

## Disclosure Results

**Latuda**

**European Marketing Authorisation Holder: Sunovion Pharmaceuticals Europe Ltd**

| phase        | total complete<br>by 31 July<br>2016 | un-evaluable | evaluable | disclosed in<br>12 month<br>timeframe | disclosed<br>percentage at<br>12 months | complete by<br>31 July 2016 | disclosed at<br>31 July 2016 | disclosure<br>percentage at<br>31st July<br>2016 |
|--------------|--------------------------------------|--------------|-----------|---------------------------------------|-----------------------------------------|-----------------------------|------------------------------|--------------------------------------------------|
| phase I & II | 16                                   | 0            | 16        | 7                                     | 44%                                     | 16                          | 13                           | 81%                                              |
| phase III    | 30                                   | 1            | 29        | 20                                    | 69%                                     | 29                          | 22                           | 76%                                              |
| phase IV     | 0                                    | 0            | 0         | 0                                     |                                         | 0                           | 0                            |                                                  |
| other        | 0                                    | 0            | 0         | 0                                     |                                         | 0                           | 0                            |                                                  |
| <b>total</b> | <b>46</b>                            | <b>1</b>     | <b>45</b> | <b>27</b>                             | <b>60%</b>                              | <b>45</b>                   | <b>35</b>                    | <b>78%</b>                                       |

**Footnote (company communication):** Ten trials remained undisclosed at 31 July 2016. Eight of these were carried out in Asia by Sumitomo Dainippon, the parent company of the European MAH; of these, results of three phase III trials are being submitted to ClinicalTrials.gov and the others were exploratory phase II or II/III, for which disclosure was not mandatory in Japan. The remaining two trials were phase I trials carried out in the US and were out of scope of FDAAA 801.

**Key to columns in table above:**

total complete by 31 July 2016 = total number of company-sponsored trials identified which were completed by 31 July 2016

unevaluable = trials with completion date within the last 12 months, or key dates missing - excluded from the analysis

evaluable = trials with all criteria present including dates; hence the base number of trials evaluated for the assessment

disclosed in 12 month timeframe = evaluable trials which were disclosed within the target 12 months\*

disclosed percentage at 12 months = proportion of evaluable trials which were disclosed within 12 months\*

complete before 31 July 2016 = number of evaluable trials completed before 31 July 2016

disclosed at 31 July 2016 = number of evaluable trials with results disclosed by 31 July 2016

disclosure percentage at 31 July 2016 = proportion of evaluable trials which were disclosed by 31 July 2016

[\* 12 months measured from the later of: the first date of regulatory approval (in Europe or the US) or the trial completion date]
