# Supplementary material
Source: publisher figshare collection journal article supplement (https://tandf.figshare.com/articles/dataset/_/5684128)
Supplement: Supplementary file 11 [file 1 › icmo_a_1415057_sm1595.pdf]

## **Disclosure Results**

**Moventig**

**European Marketing Authorisation Holder: AstraZeneca AB (note - ownership has passed to Kyowa Kirin since data collection was completed)**

| phase        | total complete by 31 July 2016 | un-evaluable | evaluable | disclosed in 12 month timeframe | disclosed percentage at 12 months | complete by 31 July 2016 | disclosed at 31 July 2016 | disclosure percentage at 31st July 2016 |
|--------------|--------------------------------|--------------|-----------|---------------------------------|-----------------------------------|--------------------------|---------------------------|-----------------------------------------|
| phase I & II | 1                              | 0            | 1         | 1                               | 100%                              | 1                        | 1                         | 100%                                    |
| phase III    | 5                              | 0            | 5         | 5                               | 100%                              | 5                        | 5                         | 100%                                    |
| phase IV     | 0                              | 0            | 0         | 0                               |                                   | 0                        | 0                         |                                         |
| other        | 0                              | 0            | 0         | 0                               |                                   | 0                        | 0                         |                                         |
| <b>total</b> | <b>6</b>                       | <b>0</b>     | <b>6</b>  | <b>6</b>                        | <b>100%</b>                       | <b>6</b>                 | <b>6</b>                  | <b>100%</b>                             |

### ***Key to columns in table above:***

total complete by 31 July 2016 = total number of company-sponsored trials identified which were completed by 31 July 2016

unevaluable = trials with completion date within the last 12 months, or key dates missing - excluded from the analysis

evaluable = trials with all criteria present including dates; hence the base number of trials evaluated for the assessment

disclosed in 12 month timeframe = evaluable trials which were disclosed within the target 12 months\*

disclosed percentage at 12 months = proportion of evaluable trials which were disclosed within 12 months\*

complete before 31 July 2016 = number of evaluable trials completed before 31 July 2016

disclosed at 31 July 2016 = number of evaluable trials with results disclosed by 31 July 2016

disclosure percentage at 31 July 2016 = proportion of evaluable trials which were disclosed by 31 July 2016

[\* 12 months measured from the later of: the first date of regulatory approval (in Europe or the US) or the trial completion date]
